# Supplementary material for: Study on the hypnotic effect of rare protopanaxadiol-type and protopanaxatriol-type ginsenosides
Source: Royal Society of Chemistry journal article supplement (doi:10.1039/c9ra01549c), 2019-01-01
Supplement: c9ra01549c1.pdf [file c9ra01549c1.pdf]

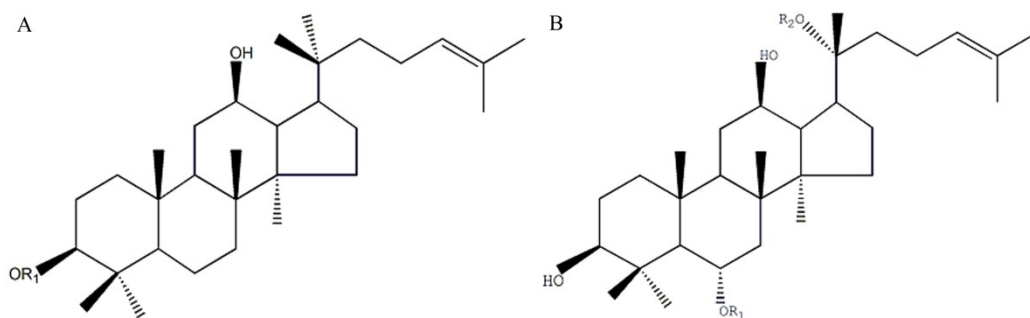

**Figure 1** The chemical molecular structure of protopanaxadiol-type ginsenosides (A) and protopanaxatriol-type ginsenosides (B).

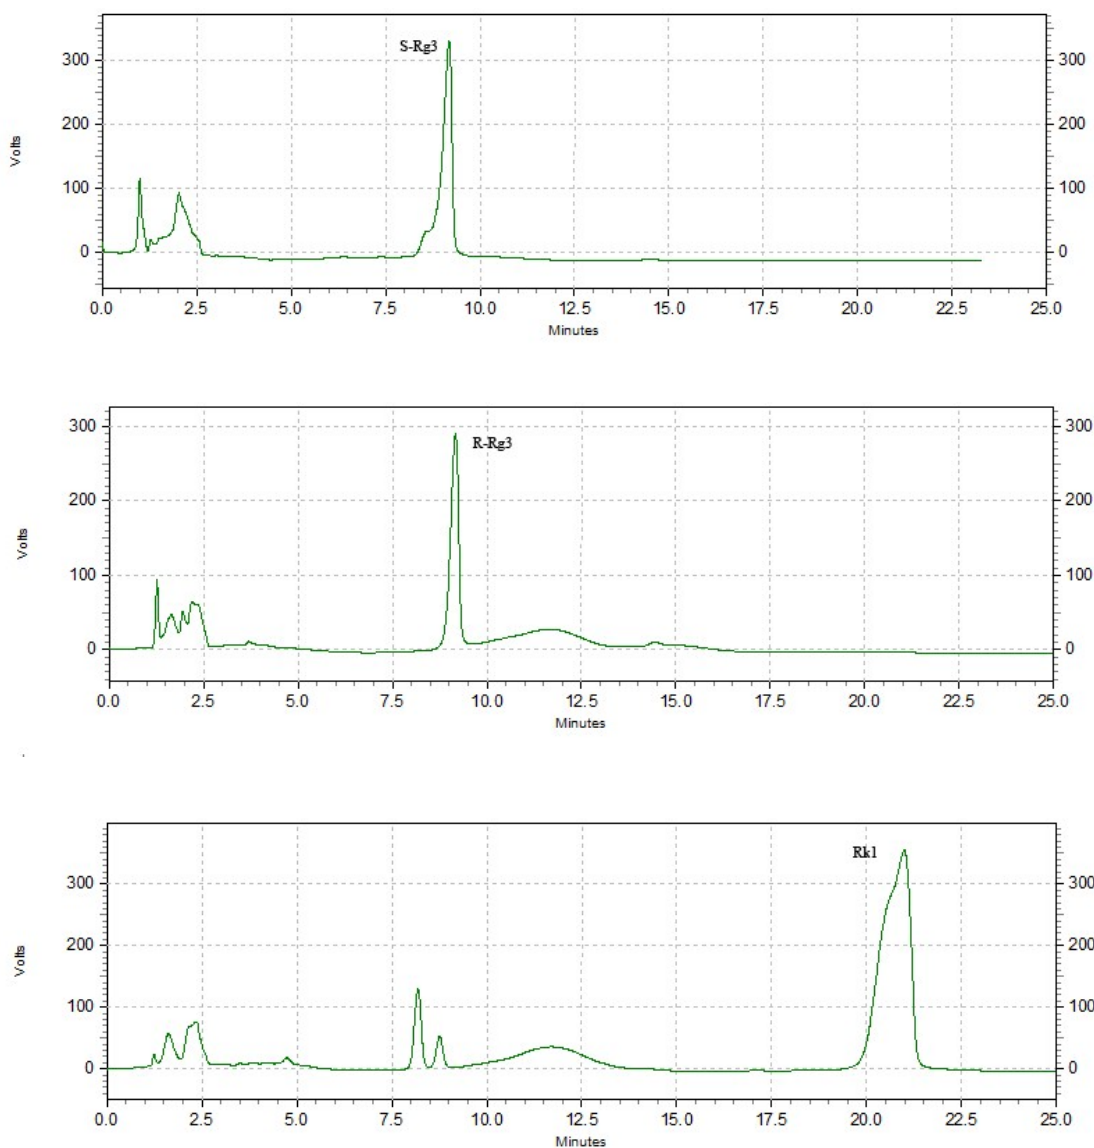

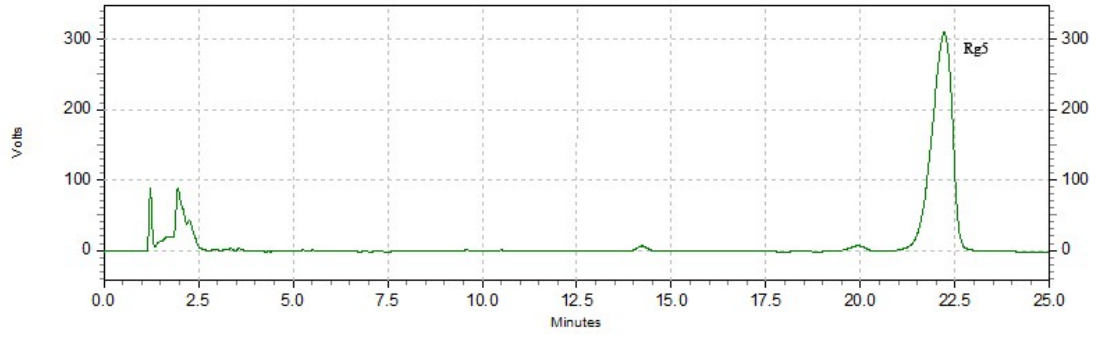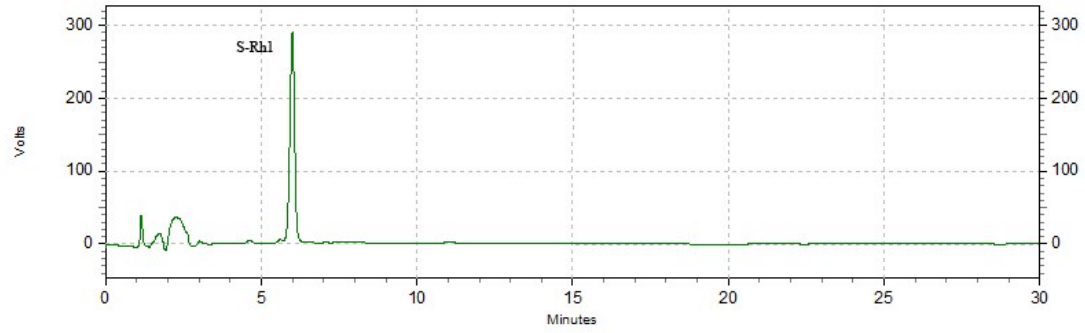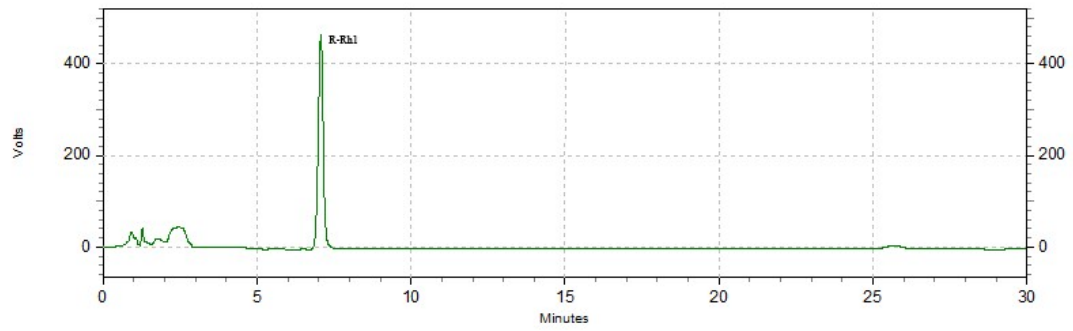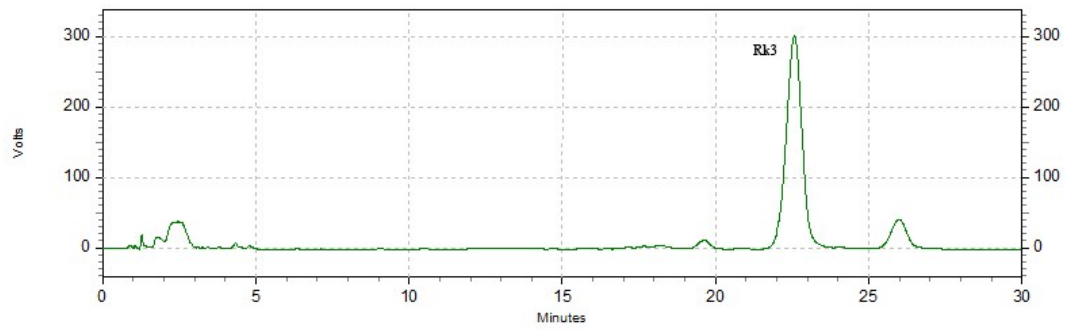

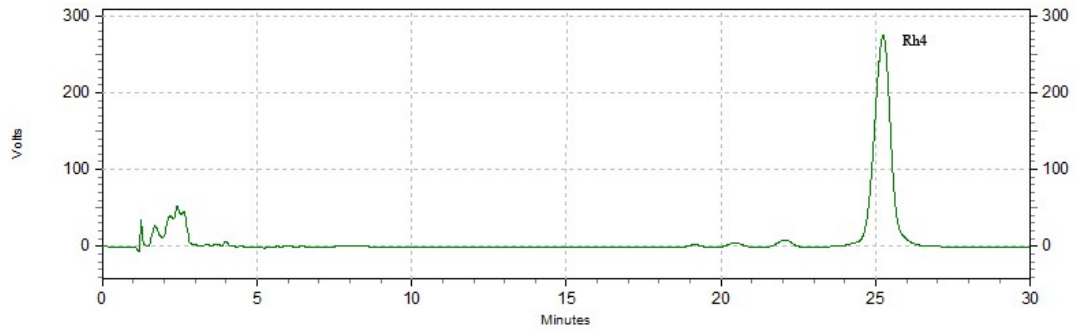

**Figure 2** The standard spectrums of S-Rg3, R-Rg3, Rk1, Rg5, S-Rh1, R-Rh1, Rk3 and Rh4.
